# Supplementary material for: Tailoring CoO–ZnO nanorod and nanotube arrays for Li-ion battery anode materials
Source: Royal Society of Chemistry journal article supplement (doi:10.1039/c3ta11538k), 2013-01-01
Supplement: c3ta11538k.pdf [file c3ta11538k.pdf]

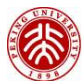

## Supporting Information

# **Tailoring CoO-ZnO Nanorod and Nanotube Arrays for Lithium Battery Anode Materials**

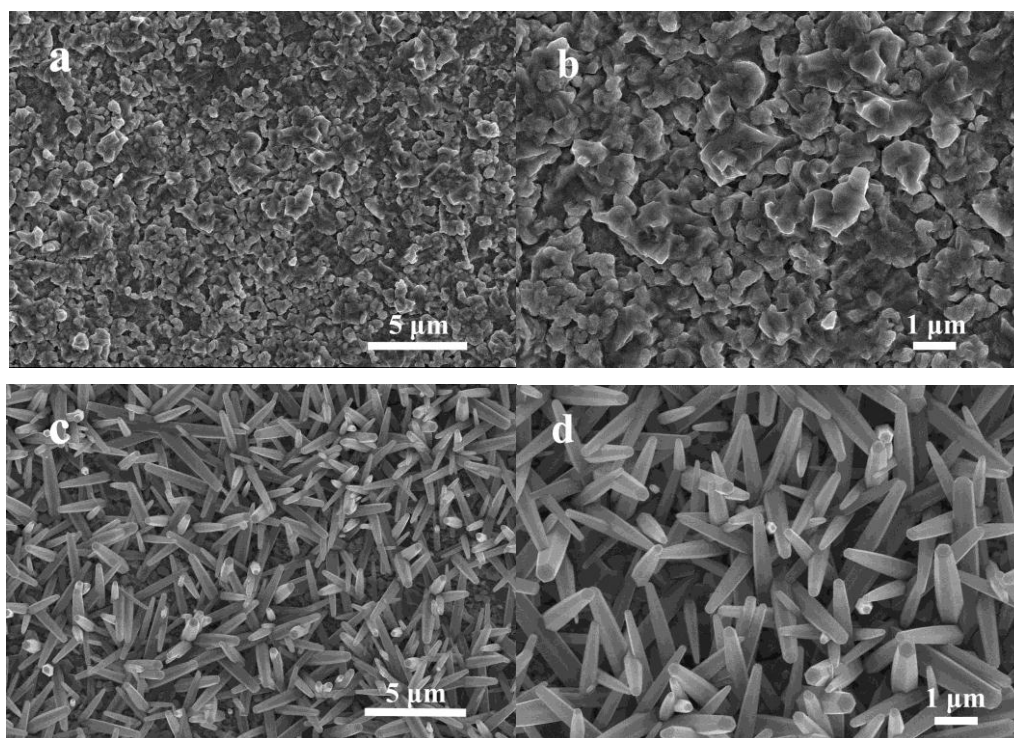

Figure S11. SEM images of copper substrate with (a) low magnification and (b) low magnification; SEM images of ZnO nanorods prepared on the copper substrate with (c) low magnification and (d) high magnification.

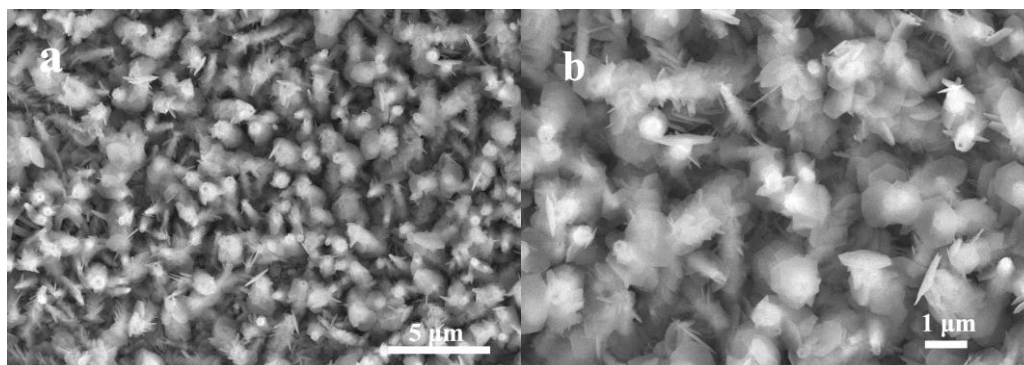

Figure SI2. SEM images of CoO-ZnO composite materials obtained at the concentration of  $\text{Co}(\text{NO}_3)_2$  0.15M on the copper substrate with (a) low magnification and (b) high magnification.

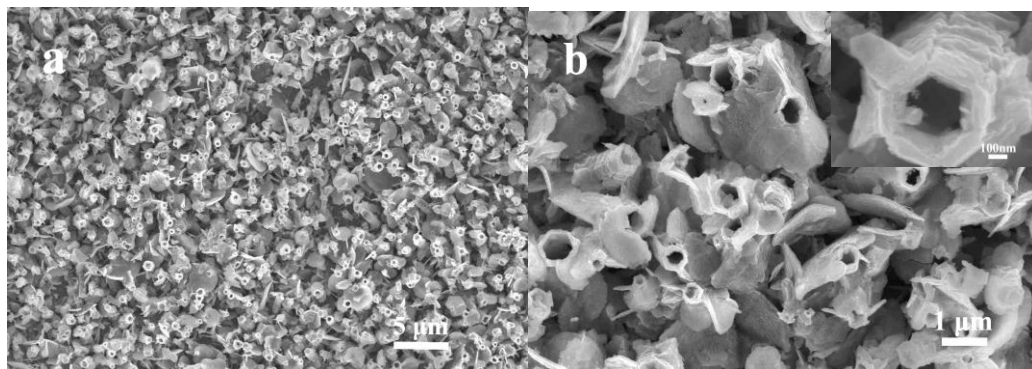

Figure SI3. SEM images of CoO-ZnO composite materials obtained at the concentration of  $\text{Co}(\text{NO}_3)_2$  0.15M on the copper substrate with (a) low magnification and (b) high magnification.

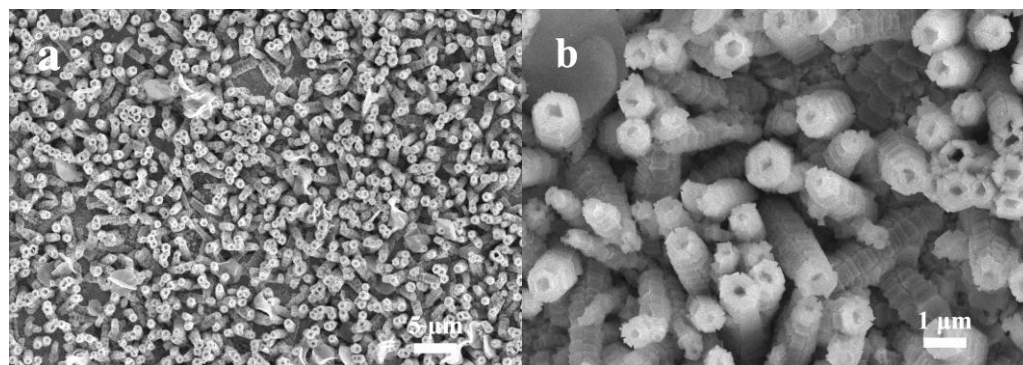

Figure S14. SEM images of CoO-ZnO composite materials obtained at the concentration of  $\text{Co}(\text{NO}_3)_2$  0.18M on the copper substrate with (a) low magnification and (b) high magnification.

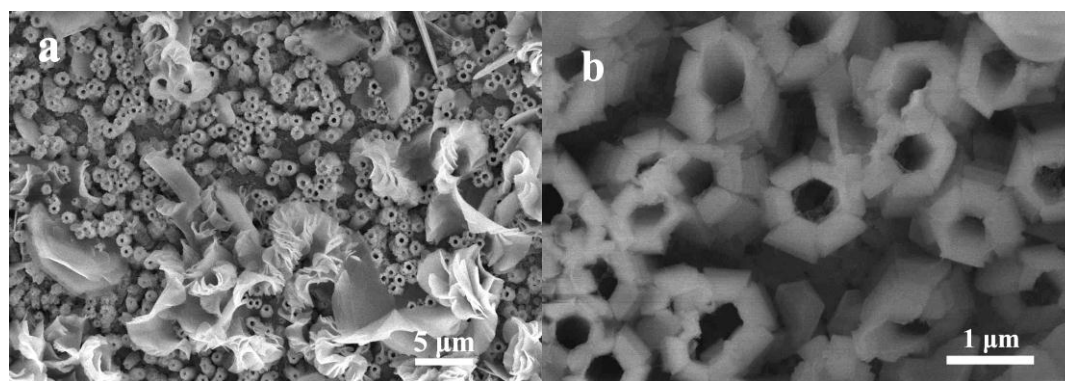

Figure SI5. SEM images of CoO-ZnO composite nanotube arrays obtained at the concentration of  $\text{Co}(\text{NO}_3)_2$  0.2M on the copper substrate with (a) low magnification and (b) high magnification.

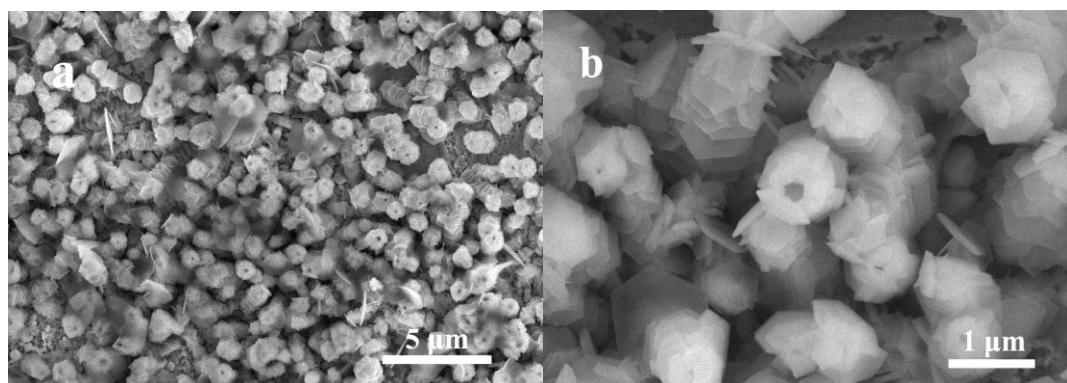

Figure SI6. SEM images of CoO-ZnO composite materials obtained at the concentration of  $\text{Co}(\text{NO}_3)_2$  0.22M on the copper substrate with (a) low magnification and (b) high magnification.

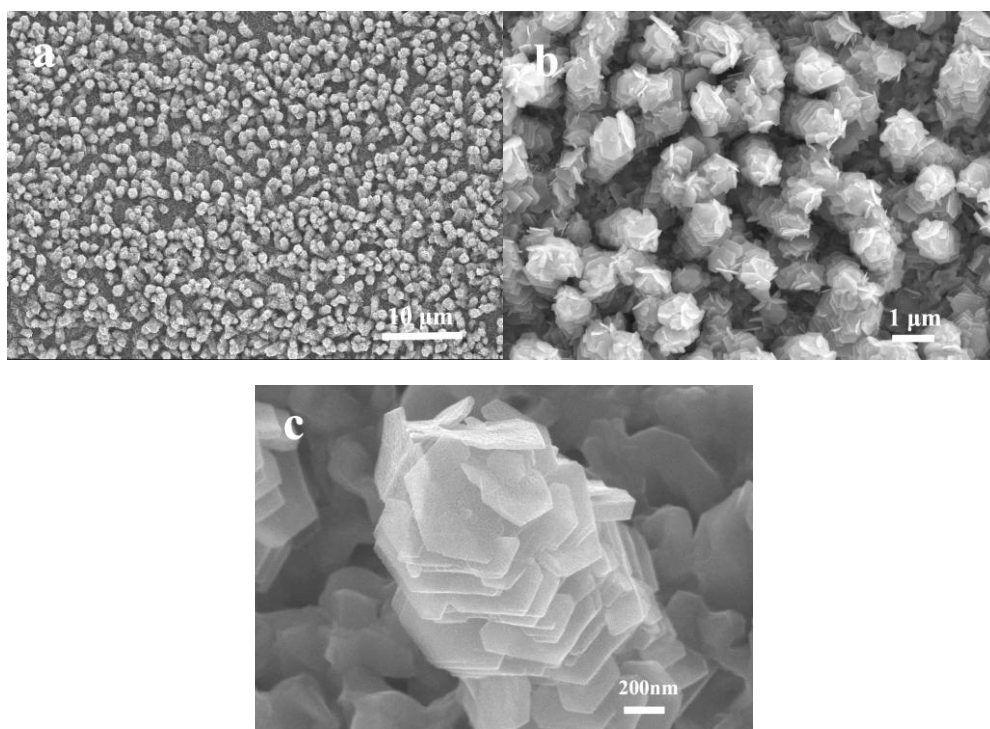

Figure SI7. SEM images of  $\text{ZnCo}_2\text{O}_4$  hierarchy nanocolumn arrays obtained at the concentration of  $\text{Co}(\text{NO}_3)_2$  0.25M on the copper substrate with (a) low magnification, (b) and (c) high magnification.



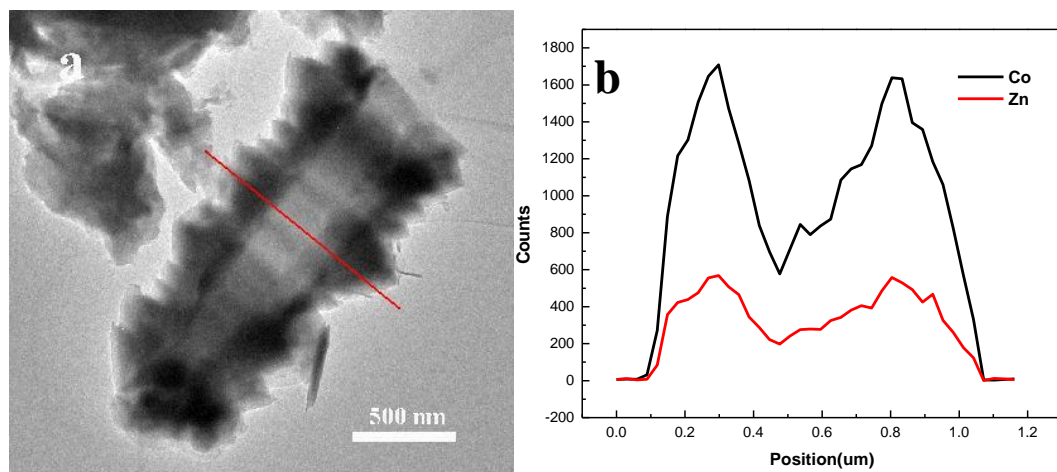

Figure S18. (a)TEM image of CoO-ZnO composite nanotube; (b) linear EDS result of the CoO-ZnO composite nanotube.

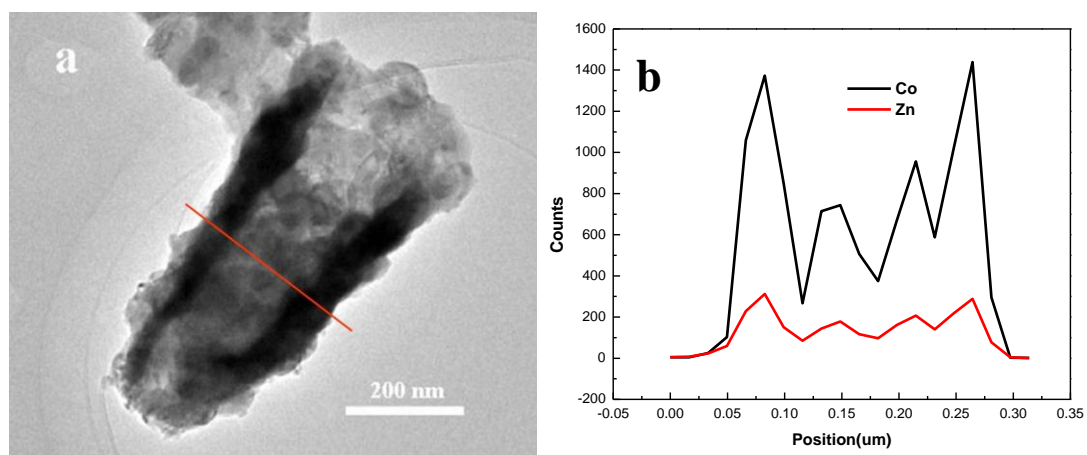

Figure S19. (a) TEM image of CoO-ZnO composite nanotube; (b) linear EDS result of the CoO-ZnO composite nanotube; (c) diffraction patterns of the nanotube.

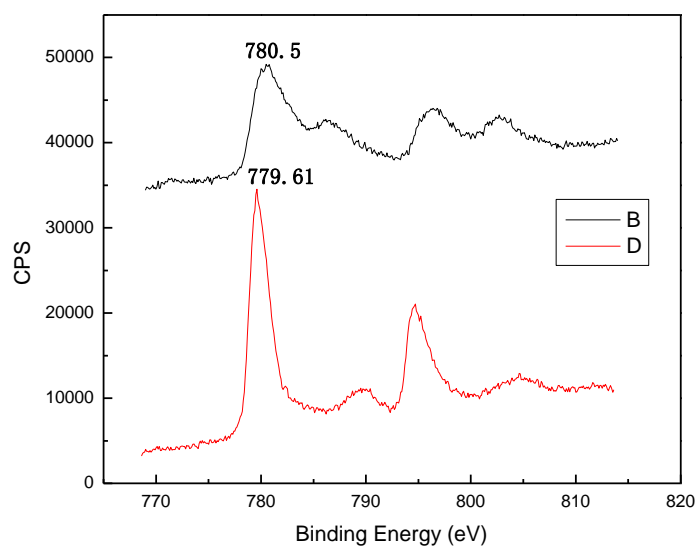

Figure SI10. XPS result of the samples annealed at 450°C in nitrogen, line B is Co(II) and line C is Co(III).

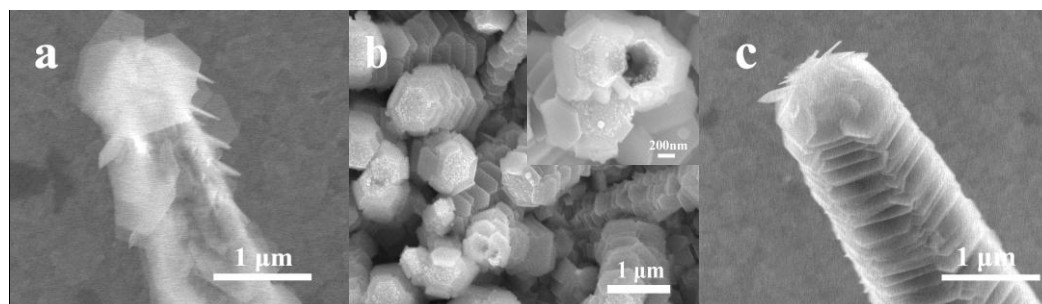

Figure SI11. SEM images of CoO-ZnO hierarchy nanocolumn obtained at 1h with the concentration of  $\text{Co}(\text{NO}_3)_2$  (a) 0.1M; (b) 0.2M; (c) 0.3M.

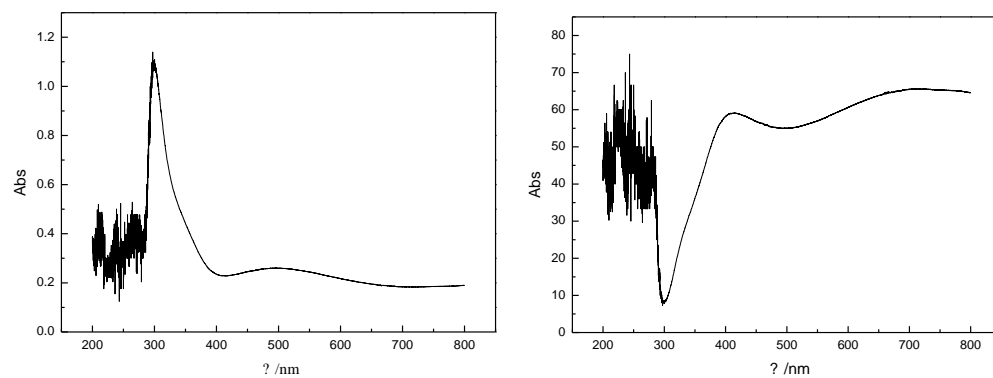

Figure SI12. UV-absorbance spectrum of  $\text{ZnCo}_2\text{O}_4$  hierarchy nanocolumns.
